# Supplementary material for: Crucial factors in biosynthesis of fluorescent CdSe quantum dots in Saccharomyces cerevisiae
Source: Royal Society of Chemistry journal article supplement (doi:10.1039/c5ra13011e), 2015-01-01
Supplement: c5ra13011e1.pdf [file c5ra13011e1.pdf]

### Supporting information

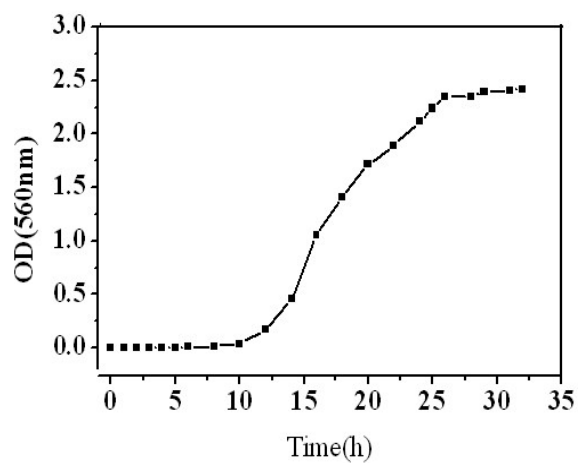

**Figure 1.** Growth curve of *Saccharomyces cerevisiae*

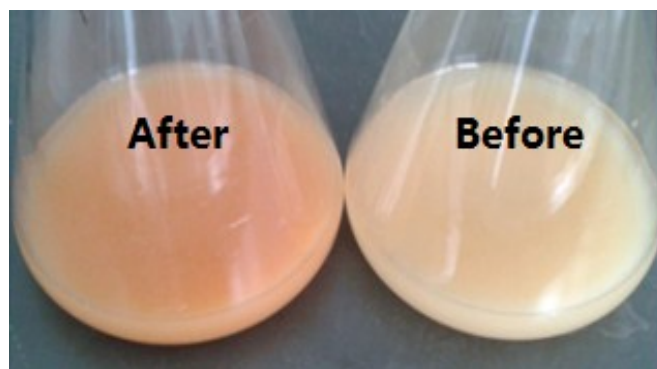

**Figure 2.** Color change of culture medium after incubated with  $\text{Na}_2\text{SeO}_3$

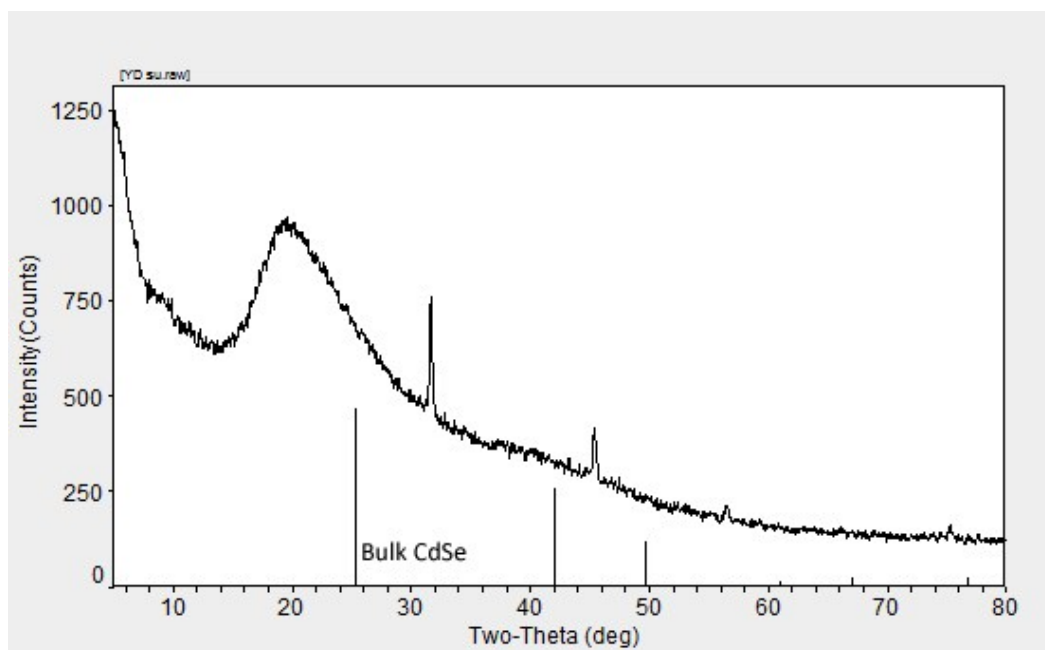

**Figure 3.** XRD of QDs products.

The original spectra of XRD has a wide high base line, like other published work, which overlaps the distinguish pattern of CdSe to clearly identify the core crystal structure. Hence, an accurate JCPDS pattern of CdSe bulk crystal is presented located in the spectrum.

**Table 1.** Comparisons of QDs products between our work and previous reports’.

| characteristics               | Synthesis method                                                                                                                                                                                                                                                                  |                                                                                                                                                           |                                                                                                             |                                                                               |                                                                                                                     |
|-------------------------------|-----------------------------------------------------------------------------------------------------------------------------------------------------------------------------------------------------------------------------------------------------------------------------------|-----------------------------------------------------------------------------------------------------------------------------------------------------------|-------------------------------------------------------------------------------------------------------------|-------------------------------------------------------------------------------|---------------------------------------------------------------------------------------------------------------------|
|                               | Chemistry                                                                                                                                                                                                                                                                         | method                                                                                                                                                    | Biological method                                                                                           |                                                                               |                                                                                                                     |
|                               | Ref 1 <sup>1</sup>                                                                                                                                                                                                                                                                | Ref 2 <sup>2</sup>                                                                                                                                        | Ref 3 <sup>3</sup>                                                                                          | Ref 4 <sup>4</sup>                                                            | The work                                                                                                            |
| <b>Particle size</b>          | 1.2 to 11.5 nm                                                                                                                                                                                                                                                                    | 2.1 to 4.8 nm                                                                                                                                             | 2.69 to 6.34 nm                                                                                             | ca. 8 nm to ca. 11 nm                                                         | 15 to 20 nm                                                                                                         |
| <b>Capped layer</b>           | Trimethylsilyl (TMS)<br>Or Tri-n-octylphosphine/Tri-n-octylphosphine oxide (TOP/TOPO)                                                                                                                                                                                             | Stearic acid and dioctylamine                                                                                                                             | Not mentioned                                                                                               | Protein molecules confirmed by FTIR                                           | Protein molecules shows in UV and EDS                                                                               |
| <b>Water soluble</b>          | Insoluble in water                                                                                                                                                                                                                                                                | Insoluble in water                                                                                                                                        | Well-dispersed in yeast cell                                                                                | Not mentioned                                                                 | Water solubable.                                                                                                    |
| <b>XRD</b>                    | The X-ray powder diffraction spectra for small CdSe crystallites (particle diameter ranging from – 1.2 to 4 nm) all exhibit broadening peaks in all reflections. There are two diffraction feature peaks, ca. $2\theta \sim 27^\circ$ and $45^\circ$ , respectively. <sup>1</sup> | The X-ray powder diffraction spectra of CdSe nanocrystals, with an average of diameter 7.5 nm, are similar to bulk wurtzite crystal of CdSe. <sup>2</sup> | Not mentioned                                                                                               | Not mentioned                                                                 | Provided in SI Figure 3                                                                                             |
| <b>EDS</b>                    | Not mentioned                                                                                                                                                                                                                                                                     | Not mentioned                                                                                                                                             | It can be confirmed that the QDs contained elements cadmium, selenium, oxygen, and phosphorus. <sup>3</sup> | Not mentioned                                                                 | Provided in Fig. 4c, which confirmed that the QDs contained elements cadmium, selenium, oxygen, carbon and sulphur. |
| <b>FL emitting wavelength</b> | Not mentioned                                                                                                                                                                                                                                                                     | from red (centered at 650 nm) to blue (centered at 450 nm)                                                                                                | 520 to ca. 560 nm and then to ca. 670 nm                                                                    | 495 nm to 510 nm                                                              | 506 nm to 562 nm                                                                                                    |
| <b>cytotoxicity</b>           | Not mentioned                                                                                                                                                                                                                                                                     | Not mentioned                                                                                                                                             | Not mentioned                                                                                               | MTT assay was carried out, showing that the biosynthesized CdSe QDs displayed | The biosynthesized CdSe QDs displayed lower cytotoxicity compared with hydrothermally                               |

|  |  |  |  |                     |                                                                                   |
|--|--|--|--|---------------------|-----------------------------------------------------------------------------------|
|  |  |  |  | lower cytotoxicity. | synthesized<br>thioglycolic acid<br>(TGA)-capped CdSe<br>and TGA capped-<br>CdTe. |
|--|--|--|--|---------------------|-----------------------------------------------------------------------------------|

## Reference

1. C. Murray, D. J. Norris and M. G. Bawendi, *J. Am. Chem. Soc.*, 1993, **115**, 8706-8715.
2. L. Qu and X. Peng, *J. Am. Chem. Soc.*, 2002, **124**, 2049-2055.
3. R. Cui, H. H. Liu, H. Y. Xie, Z. L. Zhang, Y. R. Yang, D. W. Pang, Z. X. Xie, B. B. Chen, B. Hu and P. Shen, *Adv. Funct. Mater.*, 2009, **19**, 2359-2364.
4. Z. Yan, J. Qian, Y. Gu, Y. Su, X. Ai and S. Wu, *Materials Research Express*, 2014, **1**, 015401.
